# Supplementary material for: Understanding Healthcare Workers Job Satisfaction Through Maslow’s Hierarchy: A Qualitative Study in India
Source: Research Square preprint supplement (doi:10.21203/rs.3.rs-7526298/v1), 2025-10-22
Supplement: Supplementary file 1 [file ac90d6eec34d72ce4fdd3d33.docx]

**FGD guide**

1. What are the factors, in your opinion, that are associated with Job satisfaction or dissatisfaction in the healthcare sector?

2. What do you have to say about:

a) Overall working conditions (infrastructure, workload, safety)

b) Compensation/remuneration/benefits

c) Skill development and career growth opportunities

d) Workplace harmony and general work environment

e) Human Resource (HR) policies and practices (recruitment, postings, promotions)

f) recognition and appreciation for your work

3. Why do you think these areas are critical to your job satisfaction?

4. What can be done to overcome challenges in these areas?

5. What role does your job play to make it easier or more difficult to carry out your responsibilities effectively?

6. Is there anything you would like to mention that we haven't discussed but is critical to your job satisfaction?
